# Supplementary material
Source: PubMed Central journal article supplement (PMC8110338)
Supplement: 10-1055-s-0040-1710058-s1900103.pdf [file 10-1055-s-0040-1710058-s1900103.pdf]

**Supplementary Material** Table of female patients who harbored truncating mutations and deletions in AMER1, and whose phenotype was thoroughly described in the literature

| Patient | Variant                               | Zygosity | Inheritance           | Sex | Dysmorphic features                                                                                                                                                                                                                                       | Skeletal abnormalities                                                                                         | Neuromuscular abnormalities                                          | Cardiovascular abnormalities                    | Respiratory abnormalities      | Sensorineural abnormalities | Developmental hits                           | Other abnormalities    | Source                  |
|---------|---------------------------------------|----------|-----------------------|-----|-----------------------------------------------------------------------------------------------------------------------------------------------------------------------------------------------------------------------------------------------------------|----------------------------------------------------------------------------------------------------------------|----------------------------------------------------------------------|-------------------------------------------------|--------------------------------|-----------------------------|----------------------------------------------|------------------------|-------------------------|
| 1       | c.194del<br>p.Gly65Valfs*35           | Het      | de novo               | F   | Macrocephaly   Frontal bossing   Bifid uvula   short stature                                                                                                                                                                                              | Skull sclerosis   Metaphyseal striations of the long bones                                                     |                                                                      |                                                 |                                | Hearing impairment          | Global developmental delay                   | Recurrent otitis media | Enomoto et al 2017      |
| 2       | c.429T > A;<br>p.(Cys143)             | Het      | NA                    | F   | Macrocephaly   Long face   Long philtrum   Thin lips   Narrow palate                                                                                                                                                                                      | Scoliosis   Metaphyseal striations of the long bones                                                           |                                                                      |                                                 |                                |                             |                                              |                        | Perdu et al 2011        |
| 3       | c.337delG;<br>p.(Gly113fs58*)         | Het      | NA                    | F   | Macrocephaly   Frontal bossing   Dolichocephaly   Deep-set small eyes   Epicanthus   Hypertelorism   Broad nasal bridge   Low-set ears   High arched   Narrow palate   Microretrognathia                                                                  | Skull sclerosis   Bilateral knee contracture   Metaphyseal striations of the long bones   Thoracolumbar gibbus | Poor head control   Ventriculomegaly   Megacysterna magna   Migraine |                                                 |                                | Hearing impairment          | Global developmental delay   Dentition       | Intestinal malrotation | Perdu et al 2010        |
| 4       | c.555_556delTC;<br>p.(Ala187)         | Het      | De novo               | F   | Macrocephaly   Cleft palate   Prominent forehead   Retrognathia   Anteverted nares   Clinodactyly   Hypertelorism   Epicanthus   Wide nasal bridge                                                                                                        | Metaphyseal striations of the long bones                                                                       | Ventriculomegaly   Polyhydramnios                                    | Mitral valve insufficiency/stenosis             |                                | Hearing impairment          | Intellectual disability, mild   speech delay | Wilms tumor            | Speroto et al 2017      |
| 5       | c.811C > T;<br>p.(Gln271)             | Het      | Inherited from mother | F   | Macrocephaly   Cleft palate   Hypertelorism   Pectus excavatum                                                                                                                                                                                            | Skull sclerosis   Left maxillary hypoplasia   Metaphyseal striations of the long bones                         |                                                                      | Mitral valve insufficiency/stenosis             |                                | Hearing impairment          |                                              |                        | Koenig et al 1996       |
| 6       | c.811C > T;<br>p.(Gln271)             | Het      | Inherited from mother | F   | Macrocephaly   Hypertelorism   Broad nasal bridge   Maxillary hypoplasia   Prominent mandible   Low-set ears   Dysplastic ears                                                                                                                            | Skull sclerosis   Left maxillary hypoplasia   Metaphyseal striations of the long bones, ribs and scapulae      | Hydrocephalus                                                        | Atrial septal defect   Patent ductus arteriosus |                                |                             |                                              |                        | Koenig et al 1996       |
| 7       | c.811C > T;<br>p.(Gln271)             | Het      | Inherited from mother | F   | Macrocephaly   Hypertelorism   Broad nasal bridge                                                                                                                                                                                                         | Skull sclerosis   Metaphyseal and diaphyseal striations of the long bones and jaw   Thickened calvarium        |                                                                      |                                                 |                                |                             | Speech delay                                 |                        | Koenig et al 1996       |
| 8       | c.811C > T;<br>p.(Gln271)             | Het      | Inherited from mother | F   | Macrocephaly                                                                                                                                                                                                                                              | Skull sclerosis   Metaphyseal striations of the long bones                                                     |                                                                      |                                                 |                                |                             |                                              |                        | Koenig et al 1996       |
| 9       | c.654delG;<br>p.(Asp210fs62*)         | Het      | NA                    | F   | Large forehead   Hypertelorism   Flat face   Highly arched palate   Broad nasal bridge                                                                                                                                                                    | Skull sclerosis   Thickened calvarium   Metaphyseal striations of the long bones                               |                                                                      |                                                 |                                | Hearing impairment          |                                              |                        | Perdu et al 2011        |
| 10      | c.827_842del16;<br>p.(Pro276Glnfs*13) | Het      | Germline mosaicism    | F   | Macrocephaly   Micrognathia   Cleft palate   Dysplastic ear   Wide anterior fontanelle   frontal bossing                                                                                                                                                  | Striations of the ribs   Metaphyseal striations of the long bones   Skull sclerosis                            | Ventriculomegaly   Hypotonia                                         | Atrial septal defect                            | Severe upper airway compromise | Hearing impairment          | Normal                                       |                        | O'Byrne et al 2016      |
| 11      | c.956_957insT;<br>p.(Iys320Glnfs*4    | Het      | de novo               | F   | Macrocephaly   Prominent forehead   Dolichocephaly   Persistent open anterior fontanelle   Retromicrognathia   Narrow palate   Bifid uvula   Hypertelorism   Epicanthus   Slanting palpebral fissures   Low-set ears   Broad nasal bridge   Long philtrum | Skull sclerosis   Metaphyseal and diaphyseal striations of the long bones and jaw   Talipes valgus             | Hypotonia   Ventriculomegaly                                         | left ventricular hypertarabeculation            | Tachypnea   pneumothorax       |                             | Speech delay                                 |                        | García-Aznar et al 2019 |

(Continued)

Supplementary Material (Continued)

| Patient | Variant                    | Zygosity | Inheritance            | Sex | Dysmorphic features                                                                                                                                                                                                                    | Skeletal abnormalities                                                                                                                                            | Neuromuscular abnormalities                                                                    | Cardiovascular abnormalities                         | Respiratory abnormalities                    | Sensorineural abnormalities | Developmental hits                             | Other abnormalities                                                | Source                |
|---------|----------------------------|----------|------------------------|-----|----------------------------------------------------------------------------------------------------------------------------------------------------------------------------------------------------------------------------------------|-------------------------------------------------------------------------------------------------------------------------------------------------------------------|------------------------------------------------------------------------------------------------|------------------------------------------------------|----------------------------------------------|-----------------------------|------------------------------------------------|--------------------------------------------------------------------|-----------------------|
| 12      | c.1045C>T; p.(Gln349)      | Het      | De novo                | F   | Macrocephaly   Frontal bossing   Widely spaced eyes   Blepharophimosis   Microtia   Posteriorly rotated low-set ear   Overfolded helix   Broad nasal bridge   Small nose   Cleft palate   Micrognathia                                 | Wide anterior fontanelle   Delayed bone age   skull sclerosis                                                                                                     | Ventriculomegaly   Hypoplasia of the corpus callosum   Mild muscle weakness in low extremities | Ventricular septal defect                            |                                              |                             | Developmental delay   Speech delay             | Hepatoblastoma                                                     | Fujita et al 2013     |
| 13      | c.1057C>T; p.(Arg353)      | Het      | Inherited from mother  | F   | Mild macrocephaly   Narrow forehead   Frontal bossing   Hypertelorism   Epicanthal folds   Slanting palpebral fissures   Depressed nasal bridge   Low-set ears   Pectus excavatum   High-arched palate   Dental-position abnormalities | Skull sclerosis   Striations in the pelvis   Metaphyseal striations of the long bones                                                                             |                                                                                                |                                                      |                                              | Hearing impairment          | Delayed dentition   Global developmental delay |                                                                    | Zicari et al 2012     |
| 14      | c.1057C>T; p.(Arg353)      | Het      | NA                     | F   | Hypertelorism   Epicanthal folds   Depressed nasal bridge   Hypoplastic maxillae                                                                                                                                                       | Metaphyseal striations of the long bones                                                                                                                          |                                                                                                |                                                      |                                              |                             |                                                |                                                                    | Zicari et al 2012     |
| 15      | c.1072C>T; p.(Arg358)      | Het      | NA                     | F   | Frontal bossing   Bitemporal narrowing, tooth malpositioning   Hypotelorism                                                                                                                                                            | Skull sclerosis   Metaphyseal striations of the long bones   Osteosclerosis                                                                                       |                                                                                                |                                                      |                                              | Hearing impairment   Myopia |                                                | Recurrent otitis media                                             | Jenkins et al 2008    |
| 16      | c.1072C>T; p.(Arg358)      | Het      | NA                     | F   | Macrocephaly   Facial asymmetry   Prominent of the forehead   Epicanthus   Broad nasal bridge   Abnormal dentition                                                                                                                     | Skull sclerosis   Metaphyseal and diaphyseal striations of the long bones   Abnormal normal density of the jaw                                                    |                                                                                                |                                                      |                                              | Hearing impairment          |                                                |                                                                    | Pellegrino et al 1997 |
| 17      | c.1072C>T; p.(Arg358)      | Het      | NA                     | F   | Macrocephaly   Cleft palate   Frontal bossing   Deep-set eyes   Telecanthus   Broad nasal bridge                                                                                                                                       | Skull sclerosis   Widened ribs                                                                                                                                    | Hypotonia                                                                                      | Ventricular septal defect   Patent ductus arteriosus |                                              | Hearing impairment          | Global developmental delay                     |                                                                    | Bueno et al 1998      |
| 18      | c.1072C>T; p.(Arg358)      | Het      | Inherited from father? | F   | Macrocephaly   Hypertelorism   Frontal bossing   Anteverted nares   Large mouth                                                                                                                                                        | Skull sclerosis   Metaphyseal striations of the long bones                                                                                                        | Ventriculomegaly   Polyhydramnios   Hypotonia                                                  | Ventricular septal defect                            | Respiratory distress   Laryngomalacia        | Hearing impairment          | Global developmental delay                     |                                                                    | Ciceri et al 2013     |
| 19      | c.1267delC; p.(Leu423fs25) | Het      | Inherited from mother  | F   | Macrocephaly   Flat nasal bridge   Frontal bossing   Hypertelorism                                                                                                                                                                     | Thickened calvarium   Metaphyseal striations of the long bones   Bilateral fibula   Osteosclerosis                                                                |                                                                                                |                                                      |                                              | Hearing impairment          |                                                | Recurrent otitis media   Ovarian carcinoma                         | Keymolen et al 1997   |
| 20      | c.1267delC; p.(Leu423fs25) | Het      | NA                     | F   | Macrocephaly   Polydactyly   Large forehead   Hypertelorism   Ptoxis                                                                                                                                                                   | Skull sclerosis   Thickened calvarium   Metaphyseal striations of the long bones   Bilateral fibula   Osteosclerosis                                              | Paraparesis   Positive Babinski sign                                                           |                                                      |                                              | Sensory impairment          |                                                | Multiple sclerosis   Chronic sinusitis                             | Keymolen et al 1997   |
| 21      | Whole gene deletion        | Het      | De novo                | F   | Macrocephaly   Coarse facies   Slanting of the palpebral fissure   Epicanthus inversus   Posteriorly rotated low-set ears   Folded helix   Macrotia   Wide nasal bridge   Anteverted                                                   | Flaring of the iliac wings   Widening ribs   Flattening vertebral bodies in the cervical and thoracic spine   Skull sclerosis   Abnormal head shape   Metaphyseal | Ventriculomegaly   Hypotonia   Colpoccephaly   Hypoplasia of the corpus callosum               | Ventricular septal defect   Pericardial effusion     | Laryngotracheomalacia   Chronic lung disease | Hearing impairment          | Developmental delay   Speech delay             | Hirsutism   Pyloric stenosis   Dysphagia   Gastroesophageal reflux | Herman et al 2013     |

**Supplementary Material (Continued)**

| Patient | Variant             | Zygosity | Inheritance           | Sex | Dysmorphic features                                                                                        | Skeletal abnormalities                                                                                                        | Neuromuscular abnormalities | Cardiovascular abnormalities          | Respiratory abnormalities | Sensorineural abnormalities | Development hits | Other abnormalities                                                                    | Source                 |
|---------|---------------------|----------|-----------------------|-----|------------------------------------------------------------------------------------------------------------|-------------------------------------------------------------------------------------------------------------------------------|-----------------------------|---------------------------------------|---------------------------|-----------------------------|------------------|----------------------------------------------------------------------------------------|------------------------|
| 22      | Whole gene deletion | Het      | Inherited from mother | F   | nares   Hypoplastic nasal tip   Cleft palate   Macrocephaly   Parietal bossing   Cleft palate   Syndactyly | striations of the long bones<br>Skull sclerosis   Metaphyseal striations of the long bones   Fibula osteolysis                |                             | Atrial and ventricular septal defects |                           | Hearing impairment          |                  | Anterior ectopic anus   Left hydronephrosis   Dilated left ureter   Small right kidney | Savarirayan et al 1997 |
| 23      | Whole gene deletion | Het      | Inherited from mother | F   |                                                                                                            | Thickening of the skull   Skull sclerosis   Metaphyseal striations of the long bones   Striations of the maxilla and mandible |                             |                                       |                           |                             |                  |                                                                                        | Savarirayan et al 1997 |
| 24      | Whole gene deletion | Het      | NA                    | F   | Macrocephaly   Cleft palate   Midface hypoplasia                                                           | Skull sclerosis   Metaphyseal striations of the long bones                                                                    |                             |                                       |                           | Hearing impairment          |                  |                                                                                        | Savarirayan et al 1997 |

Note: Phenotype description was adapted using the Human Ontology Phenotype terms.

Table of survival male patients who harbored truncating mutations in AMER1 and whose phenotype was thoroughly described in the literature

| Patient | Variant                          | Zygosity | Inheritance           | Sex       | Dysmorphic features                                                                                                                                                                                       | Skeletal abnormalities                                                                                                                                                 | Neuromuscular abnormalities                                                                    | Cardiovascular abnormalities                    | Respiratory abnormalities                                          | Sensorineural abnormalities | Developmental hits           | Other abnormalities                                                     | Source              |
|---------|----------------------------------|----------|-----------------------|-----------|-----------------------------------------------------------------------------------------------------------------------------------------------------------------------------------------------------------|------------------------------------------------------------------------------------------------------------------------------------------------------------------------|------------------------------------------------------------------------------------------------|-------------------------------------------------|--------------------------------------------------------------------|-----------------------------|------------------------------|-------------------------------------------------------------------------|---------------------|
| 25      | c.429T > A; p.(Cys143*)          | Hem      | Inherited from mother | M         | Dolichocephaly   High forehead   Hypertelorism   Downsloping palpebral fissures   Mild ectropion of the eyelids   Broad nasal tip   Bilateral cleft lip and palate   Dysplastic low-set ears   Hypodontia | Skull sclerosis   Short and broad clavicles   Bilateral proximal fibular hypoplasia   Broad thumbs and halluces   Flexion contractures of the fingers II-V   Scoliosis | Hypoplasia of the corpus callosum   Ventriculomegaly   Seizures   Arnold-Chiari I malformation | Atrial septal defect   Patent ductus arteriosus | Respiratory problems   Apnea                                       | Hearing impairment          | Global developmental delay   | Umbilical hernia   Hypoplastic abdominal muscles                        | Perdu et al 2011    |
| 26      | c.607_611de IAGGCC; p.Arg203fs*2 | Mos      | Somatic mosaicism     | M         | Macrocephaly   Cleft palate   Cryptorchidism   Natal tooth   Wide anterior fontanel   Hypertelorism   Broad nasal bridge   Low-set ears   Micrognathia   Deep palmar creases   Smooth philtrum            | Skull sclerosis                                                                                                                                                        | Ventriculomegaly                                                                               |                                                 | Respiratory distress                                               |                             |                              | Inguinal hernia   Gastrointestinal Reflux   Duplication of renal pelvis | Hague et al 2017    |
| 26      | c.811C > T; p.(Gln271*)          | Hem      | Inherited from mother | M         | Macrocephaly   Micrognathia   Cleft palate   Dolichocephaly   Frontal bossing   Mild hypertelorism   Broad nasal bridge   Dental malformations   Low-set ears                                             | Skull sclerosis   Maxilla sclerosis   Metaphyseal striations of the long bones                                                                                         | Ventriculomegaly                                                                               |                                                 | Tracheomalacia                                                     | Hearing impairment          |                              |                                                                         | Koenig et al 1996   |
| 27      | c.811C > T; p.(Gln271*)          | Hem      | Inherited from mother | M         | Macrocephaly   Cleft palate   Frontal and occipital bossing   Epicanthic folds   Hypertelorism   Depressed nasal bridge   Full lips                                                                       | Hip dysplasia                                                                                                                                                          |                                                                                                |                                                 | Malformation of the epiglottis   Recurrent obstructive sleep apnea |                             |                              |                                                                         | Koenig et al 1996   |
| 29      | c.654delG; p.(Asp216fs62*)       | Hem      | Inherited from mother | M (fetus) | Relatively macrocephaly   Upturned nasal tip   Long philtrum   Micrognathia   Retrognathia   Low-set rotated posteriorly ears   Underdeveloped tongue                                                     | Bilateral fibula                                                                                                                                                       | NA                                                                                             | Hypoplastic left heart   Severe heart defect    | NA                                                                 | NA                          | NA                           | Intestinal malrotation                                                  | Perdu et al 2011    |
| 30      | c.1072C > T; p.(Arg358*)         | Mos      | Germline mosaicism    | M         | Broad forehead   Hypertelorism   Epicanthus, wide nasal bridge   Low set ears                                                                                                                             | Skull sclerosis   Metaphyseal striations of the long bones   Scoliosis   Left club foot                                                                                | Ventriculomegaly   Leucomalacia                                                                |                                                 | Restrictive lung disease                                           | Hearing impairment          | Mild intellectual disability | Inguinal hernia                                                         | Holman et al 2011   |
| 31      | c.1072C > T; p.Arg358*           | Mos?     | Germline mosaicism?   | M         | Yes (similar to his daughter)                                                                                                                                                                             | Skull sclerosis   Metaphyseal striations of the long bones                                                                                                             |                                                                                                |                                                 |                                                                    | Otosclerosis                |                              |                                                                         | Cicerri et al 2013  |
| 32      | c.1108G > T; p.Glu370*           | Mos      | Mosaicism             | M         | Macrocephaly   Hypertelorism   wide nasal bridge   Talipes equinovarus   Cleft lip   Cleft palate   prominent forehead   Micrognathia                                                                     | Skull sclerosis   Metaphyseal striations of the long bones   Ankylosis                                                                                                 |                                                                                                |                                                 |                                                                    | Hearing impairment          | Mild intellectual disability | Severe stomach problems,                                                | Joseph et al 2010   |
| 33      | c.1275C > G; p.(Tyr425*)         | Hem      | Inherited from mother | M         | Yes                                                                                                                                                                                                       | Yes                                                                                                                                                                    |                                                                                                | Yes                                             |                                                                    | Yes                         | Yes                          |                                                                         | Jenkins et al 2008  |
| 34      | c.1267delC; p.(Leu423fs25*)      | NA       | NA                    | M         | Macrocephaly   Cleft palate   Frontal bossing   Hypertelorism   Bilateral epicanthus   High arched palate   Micrognathia                                                                                  | Thickened calvarium                                                                                                                                                    |                                                                                                |                                                 |                                                                    |                             |                              | Speech delay                                                            | Keymolen et al 1997 |
| 35      | c.1591C > T; p.(Arg531*)         | NA       | Inherited from mother | M         | Broad forehead   Hypertelorism   Epicanthus   Wide nasal bridge                                                                                                                                           | Skull sclerosis   Pes calcaneovalgus                                                                                                                                   | Mild spastic diplegia                                                                          | Accessory mitral valve tissue                   |                                                                    | Hearing impairment          | Mild intellectual disability |                                                                         | Holman et al 2011   |
| 36      | c.1506delA; p.(Gly502fs38*)      | Hem      | Inherited from mother | M         | Yes                                                                                                                                                                                                       | Yes                                                                                                                                                                    |                                                                                                |                                                 |                                                                    |                             | Yes                          |                                                                         | Jenkins et al 2008  |

Note: Phenotype description was adapted using the Human Ontology Phenotype terms.
